# Supplementary material for: Immune Pressure on Polymorphous Influenza B Populations Results in Diverse Hemagglutinin Escape Mutants and Lineage Switching
Source: PubMed Central journal article supplement (PMC7157493; doi:10.3390/vaccines8010125), 2020-03-11
Supplement: vaccines-08-00125-s001.pdf [file vaccines-08-00125-s001.pdf]

## Supplementary File S1

### NGS Sequence Data for Polymorphous Influenza B Populations

RNA was extracted from 14 viruses and used to make DNA libraries which were sequenced. Two extractions were performed for each virus and two reads were performed for each library. The first RNA extraction resulted in higher quality RNA and the subsequent sequence reads from this were used in the analysis. The sequence ID for each is listed in the table below. The raw sequence data is available from the HIVE database: <https://hive.biochemistry.gwu.edu/review/Immune%20pressure%20on%20polymorphous%20influenza%20B%20populations%20results%20in%20diverse%20escape%20mutants%20and%20lineage%20switching>

Data for each read includes a unique ID, file names, and the number of sequence records is displayed in the upper panel. The file names include the virus strain (CO for B/Colorado/06/2017 or PK for B/Phuket/3073/2013) and the sera used (F09, M50, M74, M09, M56 and F16), with upper or lower case used to separate the two extractions. Virus passage without sera is labeled WT (wildtype).

The sequence data for each read can be accessed using the lower panel. When the sequences tab is selected the user can chose the number of sequences to be displayed. Additional information (histograms, taxonomy etc.) can be viewed by selecting the appropriate tabs.

| Virus              | Sera      | Extraction | Read | ID     |
|--------------------|-----------|------------|------|--------|
| B/Colorado/06/2017 | None (WT) | 1          | 1    | 586421 |
| B/Colorado/06/2017 | None (WT) | 1          | 2    | 586420 |
| B/Colorado/06/2017 | None (WT) | 2          | 1    | 586393 |
| B/Colorado/06/2017 | None (WT) | 2          | 2    | 586392 |
| B/Colorado/06/2017 | f09       | 1          | 1    | 586391 |
| B/Colorado/06/2017 | f09       | 1          | 2    | 586390 |
| B/Colorado/06/2017 | F09       | 2          | 1    | 586419 |
| B/Colorado/06/2017 | F09       | 2          | 2    | 586418 |
| B/Colorado/06/2017 | m50       | 1          | 1    | 586413 |
| B/Colorado/06/2017 | m50       | 1          | 2    | 586412 |
| B/Colorado/06/2017 | M50       | 2          | 1    | 586385 |
| B/Colorado/06/2017 | M50       | 2          | 2    | 586384 |
| B/Colorado/06/2017 | m74       | 1          | 1    | 586409 |
| B/Colorado/06/2017 | m74       | 1          | 2    | 586408 |
| B/Colorado/06/2017 | M74       | 2          | 1    | 586381 |
| B/Colorado/06/2017 | M74       | 2          | 2    | 586380 |
| B/Colorado/06/2017 | m09       | 1          | 1    | 586415 |
| B/Colorado/06/2017 | m09       | 1          | 2    | 586414 |
| B/Colorado/06/2017 | M09       | 2          | 1    | 586387 |
| B/Colorado/06/2017 | M09       | 2          | 2    | 586386 |
| B/Colorado/06/2017 | m56       | 1          | 1    | 586411 |
| B/Colorado/06/2017 | m56       | 1          | 2    | 586410 |
| B/Colorado/06/2017 | M56       | 2          | 1    | 586383 |
| B/Colorado/06/2017 | M56       | 2          | 2    | 586382 |
| B/Colorado/06/2017 | f16       | 1          | 1    | 586417 |
| B/Colorado/06/2017 | f16       | 1          | 2    | 586416 |
| B/Colorado/06/2017 | F16       | 2          | 1    | 586389 |
| B/Colorado/06/2017 | F16       | 2          | 2    | 586388 |
| BPhuket/3073/2013  | None (WT) | 1          | 1    | 586407 |
| BPhuket/3073/2013  | None (WT) | 1          | 2    | 586406 |
| BPhuket/3073/2013  | None (WT) | 2          | 1    | 586379 |
| BPhuket/3073/2013  | None (WT) | 2          | 2    | 586378 |

|                   |     |   |   |        |
|-------------------|-----|---|---|--------|
| BPhuket/3073/2013 | f09 | 1 | 1 | 586405 |
| BPhuket/3073/2013 | f09 | 1 | 2 | 586404 |
| BPhuket/3073/2013 | F09 | 2 | 1 | 586377 |
| BPhuket/3073/2013 | F09 | 2 | 2 | 586376 |
| BPhuket/3073/2013 | m50 | 1 | 1 | 586399 |
| BPhuket/3073/2013 | m50 | 1 | 2 | 586398 |
| BPhuket/3073/2013 | M50 | 2 | 1 | 586371 |
| BPhuket/3073/2013 | M50 | 2 | 2 | 586370 |
| BPhuket/3073/2013 | m74 | 1 | 1 | 586395 |
| BPhuket/3073/2013 | m74 | 1 | 2 | 586394 |
| BPhuket/3073/2013 | M74 | 2 | 1 | 586367 |
| BPhuket/3073/2013 | M74 | 2 | 2 | 586366 |
| BPhuket/3073/2013 | m09 | 1 | 1 | 586401 |
| BPhuket/3073/2013 | m09 | 1 | 2 | 586400 |
| BPhuket/3073/2013 | M09 | 2 | 1 | 586373 |
| BPhuket/3073/2013 | M09 | 2 | 2 | 586372 |
| BPhuket/3073/2013 | m56 | 1 | 1 | 586397 |
| BPhuket/3073/2013 | m56 | 1 | 2 | 586396 |
| BPhuket/3073/2013 | M56 | 2 | 1 | 586369 |
| BPhuket/3073/2013 | M56 | 2 | 2 | 586368 |
| BPhuket/3073/2013 | f16 | 1 | 1 | 586403 |
| BPhuket/3073/2013 | f16 | 1 | 2 | 586402 |
| BPhuket/3073/2013 | F16 | 2 | 1 | 586375 |
| BPhuket/3073/2013 | F16 | 2 | 2 | 586374 |

---
